# Supplementary material for: Direct entry by RNase E is a major pathway for the degradation and processing of RNA in Escherichia coli
Source: PubMed Central journal article supplement (PMC4191395; doi:10.1093/nar/gku808), 2014-09-18
Supplement: supp_gku808_nar-01693-h-2014-File012.pdf [file supp_gku808_nar-01693-h-2014-File012.pdf]

# Supplementary Material

## **Direct entry by RNase E is a major pathway for the degradation and processing of RNA in *E. coli***

**Justin E. Clarke<sup>+</sup>, Louise Kime<sup>+</sup>, David Romero A., and Kenneth J. McDowall\***

\*Corresponding author: Kenneth J. McDowall ([k.j.mcdowall@leeds.ac.uk](mailto:k.j.mcdowall@leeds.ac.uk))

<sup>+</sup>Joint first authors

Astbury Centre for Structural Molecular Biology, School of Molecular and Cellular Biology, Faculty of Biological Sciences, University of Leeds, Leeds, LS2 9JT, UK

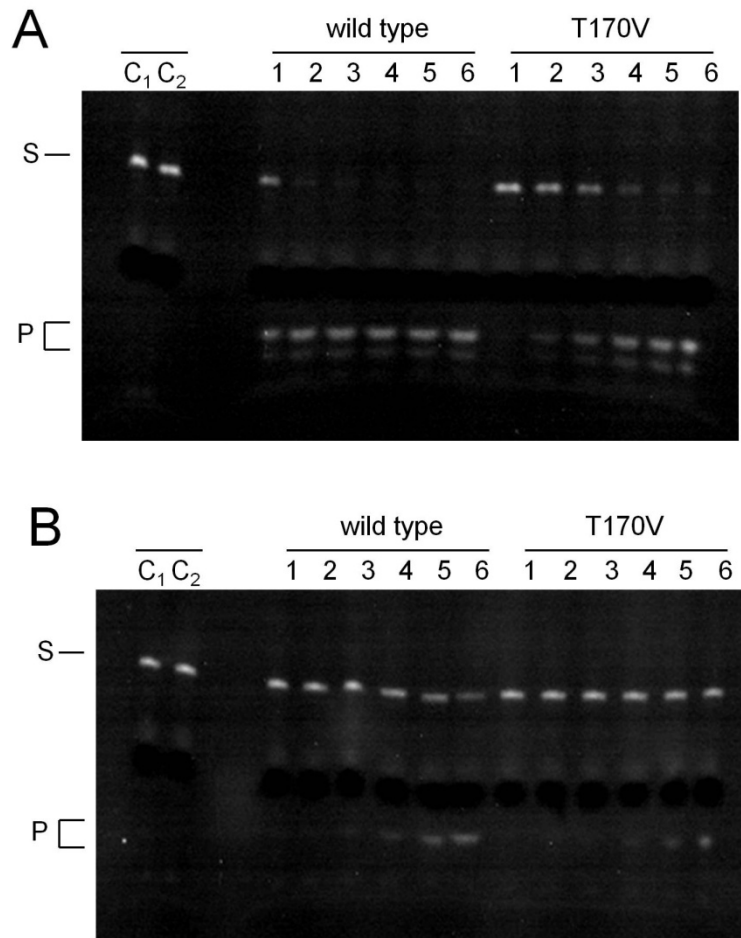

**FIG S1.** Cleavage of derivatives of BR13 by NTH-RNase E in the presence of *E. coli* total RNA. A 5'-monophosphorylated (A) or 5'-hydroxylated (B) derivative of BR13 (1), named LU13, with GAG rather than GGG at the 5' end (2) was pre-incubated with *E. coli* total RNA before addition of enzyme. Both substrates were labelled with fluorescein at the 3' end. BR13 is an oligonucleotide substrate derived from the RNase E-cleaved region at the 5' end of the antisense regulator of ColE1-type plasmid replication. The concentrations of NTH-RNase E, LU13 and total RNA at the start of the reactions were 300 nM, 15 nM and 30 ng/ $\mu$ l, respectively. Lanes 1-6 contain samples taken 0, 2, 5, 15, 30 and 60 min after mixing of substrate and enzyme. Lanes C<sub>1</sub> and C<sub>2</sub> contain substrate incubated without enzyme for 0 and 60 min, respectively. Labelling on the left of each panel indicates the position of substrate (S) and products (P).

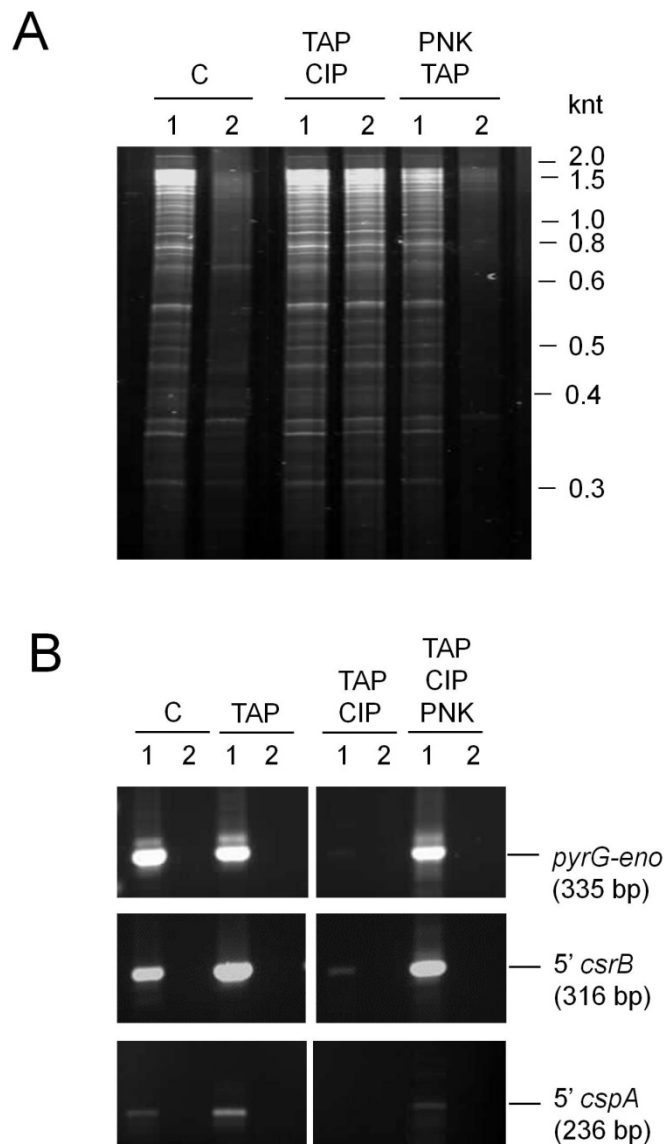

**FIG S2.** Confirming the 5' status of RNA samples prior to incubation with RNase E. (A) Analysis of enriched mRNA using Terminator™ 5' end-dependent exonuclease. Three samples of enriched mRNA were analysed: untreated (C); treated with tobacco acid pyrophosphatase (TAP) followed by calf intestinal phosphatase (CIP) to generate 5'-hydroxylated ends; or treated with T4 polynucleotide kinase (PNK) followed by TAP to generate 5'-monophosphorylated ends. The RNA was then incubated in the absence (Lane 1) or presence (Lane 2) of Terminator™ exonuclease, which is a 5'-3' exonuclease that at low concentrations is specific for 5'-monophosphorylated RNA (3). The products were analysed by denaturing gel electrophoresis as described in Fig. 1. The positions of RNA size markers (not shown) are indicated on the right. For details of each of the treatments and digestion by Terminator™ exonuclease, see 'Materials and Methods'. The combination of TAP and CIP produced RNA that was resistant to TEX indicating that it had been 5' hydroxylated as expected. While bulk RNA was already susceptible to TEX prior to treatment, the combination of PNK and TAP increased the susceptibility further as evidenced by the reduction in the amount of RNA species < 1 knt. This indicated that the RNA had been 5' monophosphorylated. (B) Analysis of total RNA using RNA ligase-mediated RT-

PCR. This technique allows the detection of RNAs that are 5' monophosphorylated. Total RNA was treated with the indicated enzymes to modify the 5' ends. The lanes labelled C represent RNA that has not been treated with 5' end modifying enzymes. Following ligation of an RNA adapter to the 5' ends of the total RNA, the RNA was reverse transcribed in the presence (Lane 1) or absence (Lane 2) of reverse transcriptase. PCR was then used to analyse the 5'-end status of targets using a forward primer specific for the RNA adapter and a reverse primer specific for the amplification of an RNase E-dependent processing site in the intergenic region between *pyrG* and *eno* and the transcription start sites of *csrB* and *cspA*. Labelling on the right identifies the targets and the expected sizes in base pairs of the amplicons. The observed mobility of these products relative to size markers was consistent with their expected size (data not shown). The RLM-PCR analysis was done as described previously (4). The sequence of the primer specific for the RNA adapter was 5'-CGAAGACAACAAAGAAGTTCAACTC and the sequences of the primers specific for *pyrG-eno*, *csrB* and *cspA* were 5'-GTCAATGCCAGCCTGATCTT, 5'-CAACTTTTCCTCTGGCCTTG and 5'-TGTCAGCGTTGAACCATTTT, respectively. As expected, TAP treatment increased the amount of *csrB* and *cspA* mRNA that was amplified, while not affecting the amplification of the *pyrG-eno* intermediate, and subsequent CIP treatment blocked amplification of all three species. Finally, treatment with PNK restored amplification to maximum levels. Amplification of *csrB* and *cspA* mRNA in the absence of TAP treatment was expected and reflects 'decapping' *in vivo*. Thus, all three enzymes appeared to modify RNA as expected. The efficiency of 5' phosphate removal for some RNAs was increased by incubating with TAP followed by CIP rather than with CIP alone.

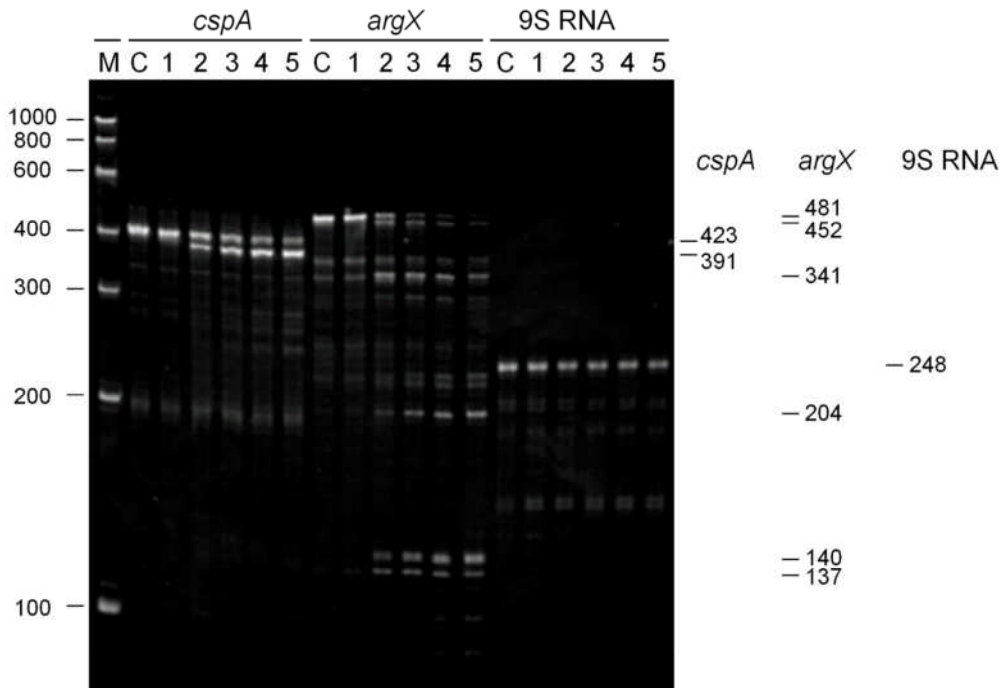

**FIG S3.** Positive and negative controls for the assay of direct-entry cleavage. The *cspA* mRNA and *argX-hisR-leuT-proM* precursor provide positive controls, while 9S RNA provides a negative control. The 5'-triphosphorylated transcripts were generated by *in vitro* transcription using templates and conditions described previously (3,4). The conditions for the cleavage assays, the preparation of the T170V mutant of RNase E, and the analysis of reaction products by denaturing gel electrophoresis were also as described previously (3,4). The enzyme monomer and initial substrate concentrations at the start of each reaction were 20 and 180 nM, respectively. The RNA was stained using ethidium bromide. Lanes 1–5 contain samples taken 0, 5, 15, 30, and 60 min, respectively, after mixing substrate and enzyme. Lane C contains substrate incubated without enzyme for 60 min. The sizes (nt) of RNA markers (Thermo Scientific RiboRuler Low Range) are indicated on the left of the panel. The sizes of the major species are indicated on the right of the panel. The *cspA* species of 391 nt corresponds to the upstream product of cleavage on the 5' side of the transcription terminator (2,5). The *argX* species of 452, 341, 204, 140 and 137 nt correspond to the 5' end to E5 site, E1 to E5, E1 to E3, 5' end to E1, and E3 to 3' end, respectively (3).

| Transcript            | Primer | Primer sequence (5' to 3')                     |
|-----------------------|--------|------------------------------------------------|
| <i>rnc</i> (871 nt)   | FWD    | ATCCTAATACGACTCACTATAGGGGAAGTTTAAGGTTGGCAC     |
| <i>rnc</i> (358 nt)   | FWD    | ATCCTAATACGACTCACTATAGGGATTAATTGGTGGCGTA       |
|                       | RVS    | TAAATCCGCAGTAACTTTTATCG                        |
| <i>uspF</i>           | FWD    | ATCCTAATACGACTCACTATAGGGGGATACTAAAACAGG        |
|                       | RVS    | AAAGCCCGCAGCAATGTG                             |
| <i>tomB/hha</i>       | FWD    | ATCCTAATACGACTCACTATAGGGCTAACAAACGAGAGGGCAAG   |
|                       | RVS    | TCTTAATAAACAGCCGGTTATAGC                       |
| <i>fdhE</i>           | FWD    | ATCCTAATACGACTCACTATAGGGGCATATCTACGCCGCCCTTT   |
|                       | RVS    | TTAATGCGCGCAGTCAGATC                           |
| <i>cspA</i>           | FWD    | ATCCTAATACGACTCACTATAGGGTTTGACGTACAGACC        |
|                       | RVS    | AAAATCCCCGCCAAATGGCAGGG                        |
| 9S ( <i>rrfB</i> )    | FWD    | ATCCTAATACGACTCACTATAGGGGAAGCTGTTTTGGCGGATGAG  |
|                       | RVS    | ACGAAAGGCCAGTCTTTTC                            |
| <i>argX</i>           | FWD    | ATCCTAATACGACTCACTATAGGGGAACGGCGCTAAGCGCCCG    |
|                       | RVS    | AAAAAACCCCGCCGAAGCGG                           |
| <i>rne</i> (1138 nt)  | FWD    | ATCCTAATACGACTCACTATAGGGGTTTCCGTGTCCATCCTTGT   |
|                       | RVS    | CAGTTTGATTTTGCTGCTGA                           |
| <i>rne</i> (457 nt)   | FWD    | ATCCTAATACGACTCACTATAGGGAATCACCCGCATTGAACC     |
|                       | RVS    | TTTTTTGATGGCTTCCCAGTG                          |
| <i>rne</i> (409 nt)   | FWD    | ATCCTAATACGACTCACTATAGGGAATCACCCGCATTGAACC     |
|                       | RVS    | CAGCGCCTCAGCAGATTT                             |
| <i>rne</i> (315 nt)   | FWD    | ATCCTAATACGACTCACTATAGGGGTGTTGCGTGAAGGTCAGG    |
|                       | RVS    | TTTTTTGATGGCTTCCCAGTG                          |
| <i>rne</i> (267 nt)   | FWD    | ATCCTAATACGACTCACTATAGGGGTGTTGCGTGAAGGTCAGG    |
|                       | RVS    | CAGCGCCTCAGCAGATTT                             |
| <i>cspC</i>           | FWD    | ATCCTAATACGACTCACTATAGGGACGCCAGTTTAAGTATCTGCC  |
|                       | RVS    | TTCACGCGAAAGAGGCT                              |
| <i>uspG</i>           | FWD    | ATCCTAATACGACTCACTATAGGGGCGAATGATTTGTTTCATGATT |
|                       | RVS    | ATTAATAAGCCCGCCG                               |
| <i>ftsI</i>           | FWD    | ATCCTAATACGACTCACTATAGGGTGGCGCTACCAGGCG        |
|                       | RVS    | TTACGATCTGCCACCTGTCCT                          |
| <i>envZ</i>           | FWD    | ATCCTAATACGACTCACTATAGGGATGTTGATGACCGACAAACTG  |
|                       | RVS    | GGCCGCCAGTTGCT                                 |
| <i>glnW-metU-glnV</i> | FWD    | ATCCTAATACGACTCACTATAGGGTGGGGTATCGCCAAGC       |
|                       | RVS    | TGGCTGGGGTACGAGGAT                             |
| <i>glyX-glyY</i>      | FWD    | ATCCTAATACGACTCACTATAGGGGCGGGAATAGCTCAGTTGG    |
|                       | RVS    | GCGTCGCTGTGGATATTTTATT                         |

**Table S1.** The sequence of primers used to generate cDNA templates for T7 *in vitro* transcription. Underlining indicates the position of the sequence of the T7 polymerase promoter in each of the forward primers. The numbers in parentheses indicate the sizes of the corresponding transcripts.

| Position | Strand | M ( <i>in vivo</i> ) | M ( <i>in vitro</i> ) | Associated Gene         | Position      |
|----------|--------|----------------------|-----------------------|-------------------------|---------------|
| 93136    | fwd    | 7.17                 | 9.96                  | <i>ftsI</i>             | internal      |
| 93144    | fwd    | 6.40                 | 8.24                  | <i>ftsI</i>             | internal      |
| 113122   | rvs    | 5.46                 | 8.75                  | <i>coaE</i>             | internal      |
| 190802   | fwd    | 5.15                 | 9.42                  | <i>tsf</i>              | 5' intergenic |
| 227695   | fwd    | 5.43                 | 9.61                  | 23S rRNA of <i>rrnH</i> | internal      |
| 323669   | fwd    | 5.90                 | 9.49                  | <i>ykgG</i>             | internal      |
| 447668   | rvs    | 5.61                 | 8.74                  | <i>cyoC</i>             | internal      |
| 449135   | rvs    | 6.69                 | 8.43                  | <i>cyoB</i>             | internal      |
| 449152   | rvs    | 5.70                 | 8.31                  | <i>cyoB</i>             | internal      |
| 452839   | rvs    | 8.03                 | 11.82                 | <i>yajG</i>             | internal      |
| 479558   | rvs    | 5.19                 | 9.91                  | <i>ybaJ</i>             | internal      |
| 640655   | rvs    | 5.42                 | 8.21                  | <i>uspG</i>             | 3' UTR        |
| 709635   | rvs    | 5.29                 | 9.11                  | <i>fur</i>              | internal      |
| 754611   | fwd    | 9.77                 | 8.09                  | <i>sdhC</i>             | internal      |
| 754977   | fwd    | 5.29                 | 8.22                  | <i>sdhD</i>             | internal      |
| 754978   | fwd    | 5.53                 | 8.57                  | <i>sdhD</i>             | internal      |
| 755103   | fwd    | 5.04                 | 9.66                  | <i>sdhD</i>             | internal      |
| 755105   | fwd    | 5.49                 | 10.75                 | <i>sdhD</i>             | internal      |
| 778815   | fwd    | 6.30                 | 8.82                  | <i>ybgF</i>             | 5' intergenic |
| 846518   | rvs    | 5.37                 | 8.58                  | <i>glnH</i>             | internal      |
| 963323   | fwd    | 5.46                 | 8.48                  | <i>ihfB</i>             | internal      |
| 985413   | rvs    | 6.29                 | 10.39                 | <i>ompF</i>             | internal      |
| 985851   | rvs    | 5.36                 | 8.54                  | <i>ompF</i>             | internal      |
| 985860   | rvs    | 5.67                 | 9.84                  | <i>ompF</i>             | internal      |
| 1018886  | rvs    | 5.32                 | 9.63                  | <i>ompA</i>             | internal      |
| 1143045  | rvs    | 5.00                 | 8.08                  | <i>rne</i>              | internal      |
| 1224121  | rvs    | 7.24                 | 8.65                  | <i>minD</i>             | internal      |
| 1224577  | rvs    | 5.36                 | 7.99                  | <i>minD</i>             | internal      |
| 1300973  | fwd    | 6.09                 | 8.37                  | <i>oppB</i>             | internal      |
| 1300979  | fwd    | 5.73                 | 9.11                  | <i>oppB</i>             | internal      |
| 1407235  | fwd    | 6.19                 | 8.01                  | FnrS sRNA               | internal      |
| 1433290  | rvs    | 5.69                 | 8.68                  | <i>uspF</i>             | internal      |
| 1487678  | fwd    | 5.29                 | 9.08                  | <i>aldA</i>             | internal      |
| 1487690  | fwd    | 6.37                 | 10.32                 | <i>aldA</i>             | internal      |
| 1515133  | rvs    | 6.36                 | 8.08                  | <i>yncL</i>             | internal      |
| 1900641  | fwd    | 5.29                 | 10.13                 | <i>manX</i>             | internal      |
| 1905419  | fwd    | 5.39                 | 10.30                 | unknown                 |               |
| 1905439  | rvs    | 5.67                 | 8.94                  | <i>cspC</i>             | internal      |
| 1905470  | rvs    | 7.42                 | 9.07                  | <i>cspC</i>             | 5' intergenic |
| 2109053  | rvs    | 6.99                 | 8.58                  | <i>rfbD</i>             | 5' intergenic |
| 2170205  | rvs    | 5.44                 | 8.23                  | <i>gatD</i>             | internal      |
| 2170543  | rvs    | 6.27                 | 9.40                  | <i>gatD</i>             | internal      |
| 2170904  | rvs    | 5.04                 | 8.76                  | <i>gatD</i>             | 5' intergenic |
| 2170945  | rvs    | 5.29                 | 9.66                  | <i>gatC</i>             | internal      |
| 2170946  | rvs    | 6.22                 | 8.58                  | <i>gatC</i>             | internal      |
| 2170947  | rvs    | 6.50                 | 8.67                  | <i>gatC</i>             | internal      |
| 2170950  | rvs    | 5.64                 | 9.76                  | <i>gatC</i>             | internal      |
| 2171642  | rvs    | 7.65                 | 8.39                  | <i>gatC</i>             | internal      |
| 2171832  | rvs    | 6.41                 | 9.82                  | <i>gatC</i>             | internal      |
| 2173243  | rvs    | 6.38                 | 8.89                  | <i>gatZ</i>             | internal      |
| 2237371  | rvs    | 6.02                 | 8.76                  | <i>mgIB</i>             | internal      |
| 2238426  | fwd    | 5.67                 | 8.45                  | unknown                 |               |
| 2238477  | rvs    | 6.75                 | 8.67                  | <i>mgIB</i>             | 5' intergenic |

|         |     |      |       |                         |               |
|---------|-----|------|-------|-------------------------|---------------|
| 2268103 | fwd | 7.20 | 9.04  | <i>mepS (spr)</i>       | internal      |
| 2388534 | rvs | 8.01 | 8.64  | <i>nuoN</i>             | internal      |
| 2392843 | rvs | 6.86 | 8.41  | <i>nuoL</i>             | internal      |
| 2393046 | rvs | 5.67 | 8.73  | <i>nuoL</i>             | internal      |
| 2397080 | rvs | 8.04 | 8.34  | <i>nuoG</i>             | internal      |
| 2397802 | rvs | 5.36 | 8.75  | <i>nuoG</i>             | internal      |
| 2397961 | rvs | 8.04 | 8.99  | <i>nuoG</i>             | internal      |
| 2401345 | rvs | 5.95 | 8.26  | <i>nuoC</i>             | internal      |
| 2402226 | rvs | 5.81 | 9.08  | <i>nuoB</i>             | internal      |
| 2402633 | rvs | 6.41 | 10.08 | <i>nuoB</i>             | internal      |
| 2403043 | rvs | 5.04 | 8.89  | <i>nuoA</i>             | internal      |
| 2519165 | fwd | 6.43 | 8.85  | <i>valX</i> tRNA        | 3' intergenic |
| 2576334 | rvs | 5.58 | 8.37  | <i>maeB</i>             | internal      |
| 2701527 | rvs | 5.49 | 9.17  | <i>rnc</i>              | internal      |
| 2721316 | fwd | 5.43 | 8.76  | <i>pssA</i>             | internal      |
| 2725271 | rvs | 6.04 | 10.94 | 23S rRNA of <i>rrnG</i> | internal      |
| 2743349 | fwd | 5.78 | 10.78 | unknown                 |               |
| 2743400 | rvs | 5.09 | 11.27 | <i>rimM</i>             | internal      |
| 2865691 | rvs | 5.42 | 8.28  | <i>nlpD</i>             | internal      |
| 2865699 | rvs | 5.83 | 8.52  | <i>nlpD</i>             | internal      |
| 2922302 | rvs | 6.24 | 9.22  | <i>csrB</i>             | internal      |
| 3144295 | rvs | 6.02 | 8.89  | <i>hybO</i>             | 5' UTR        |
| 3331735 | fwd | 5.32 | 8.19  | <i>ispB</i>             | internal      |
| 3422870 | rvs | 5.93 | 9.98  | 23S rRNA of <i>rrnD</i> | internal      |
| 3430051 | rvs | 6.36 | 8.17  | <i>smg</i>              | internal      |
| 3440310 | rvs | 5.70 | 8.96  | <i>rpsM</i>             | internal      |
| 3533575 | rvs | 5.13 | 8.17  | <i>envZ</i>             | internal      |
| 3551863 | fwd | 6.09 | 9.40  | <i>malT</i>             | internal      |
| 3887308 | fwd | 6.60 | 8.93  | <i>tnaA</i>             | internal      |
| 3887483 | fwd | 7.69 | 8.05  | <i>tnaA</i>             | internal      |
| 3888162 | fwd | 5.23 | 8.66  | <i>tnaA</i>             | internal      |
| 3888164 | fwd | 5.64 | 9.47  | <i>tnaA</i>             | internal      |
| 3888212 | rvs | 5.01 | 8.84  | unknown                 |               |
| 3888213 | rvs | 6.17 | 9.76  | unknown                 |               |
| 3888215 | fwd | 5.46 | 8.07  | <i>tnaB</i>             | 5' intergenic |
| 3888613 | fwd | 6.00 | 8.31  | <i>tnaB</i>             | internal      |
| 3934182 | fwd | 6.00 | 8.51  | <i>rbsC</i>             | internal      |
| 3980610 | fwd | 9.01 | 9.13  | <i>hisR</i> tRNA        | 3' intergenic |
| 3980835 | fwd | 6.30 | 9.67  | <i>proM</i> tRNA        | 3' intergenic |
| 4079159 | rvs | 5.17 | 10.13 | <i>fdhE</i>             | internal      |
| 4130357 | fwd | 5.73 | 8.47  | <i>metL</i>             | 3' UTR        |
| 4379660 | rvs | 5.73 | 8.03  | <i>frdA</i>             | internal      |
| 4390571 | fwd | 5.46 | 8.43  | <i>glyX</i> tRNA        | 3' intergenic |
| 4390572 | fwd | 5.93 | 10.39 | <i>glyX</i> tRNA        | 3' intergenic |
| 4414751 | rvs | 5.81 | 8.31  | <i>yjfO</i>             | internal      |
| 4437515 | fwd | 5.09 | 8.30  | <i>ytfK</i>             | 5' UTR        |

**Table S2.** The top 100 sites of RNase E direct entry *in vitro*. Sites with the highest M values upon incubation with T170V after 10 min were selected from those which also had a minimum M value of 5 upon inactivation of *rne* *in vivo*. The chromosomal positions and strand were used to map these sites to their associated genes. The position of cleavage relative to the gene coding region is also indicated.



## References

1. McDowall, K.J., Kaberdin, V.R., Wu, S.W., Cohen, S.N. and Lin-Chao, S. (1995) Site-specific RNase E cleavage of oligonucleotides and inhibition by stem-loops. *Nature*, **374**, 287-290.
2. Kime, L., Jourdan, S.S., Stead, J.A., Hidalgo-Sastre, A. and McDowall, K.J. (2010) Rapid cleavage of RNA by RNase E in the absence of 5' monophosphate stimulation. *Mol. Microbiol.*, **76**, 590-604.
3. Kime, L., Clarke, J.E., Romero, A.D., Grasby, J.A. and McDowall, K.J. (2014) Adjacent single-stranded regions mediate processing of tRNA precursors by RNase E direct entry. *Nucleic Acids Res.*, **42**, 4577-4589.
4. Kime, L., Jourdan, S.S. and McDowall, K.J. (2008) In Maquat, L. E. and Arraiano, C. M. (eds.), *Methods in Enzymology: RNA Turnover in Bacteria, Archaea and Organelles*. Academic Press, Vol. 447, pp. 215-241.
5. Hankins, J.S., Zappavigna, C., Prud'homme-Genereux, A. and Mackie, G.A. (2007) Role of RNA structure and susceptibility to RNase E in regulation of a cold shock mRNA, *cspA* mRNA. *J. Bacteriol.*, **189**, 4353-4358.
